# Supplementary material for: Virtual overdose monitoring services/mobile overdose response services: estimated number of potentially averted drug poisoning fatality events by various telephone and digital-based overdose prevention/harm reduction services in North America
Source: Frontiers journal article supplement (doi:10.3389/fpubh.2023.1242795), 2023-10-19
Supplement: Data_Sheet_1.PDF [file Data_Sheet_1.PDF]

# VIRTUAL OVERDOSE MONITORING

## Mobile Applications and Hotlines for Solitary Drug Use

### Hotlines

#### Never Use Alone (NUA) - USA

#### The National Overdose Response Service (NORS) - Canada

- Monitored 24/7
- Phone operators take the callers, name, location they are calling from and substances they are using and stay on the line until the caller is no longer at risk of overdose
- If not responding the operator contacts emergency medical services (EMS)
- Staffed by people with lived experience of substance use

NUA:  
13 potential lives saved[95% CI: 3, 22]

NORS:  
35 potential lives saved[95% CI: 9, 60]  
No deaths reported

- Pros**
- Toll free numbers – dont require callers to have minutes on their devices
  - Doesn't require caller to have a smartphone
  - Peer-to-peer connection
- Cons**
- Caller must have access to a charged phone

### Mobile Apps

#### The Canary - Prevent Overdose App

- Monitors users inactivity through body movements, respiration and responses to prompts after activation

No data available on the efficacy of the service

#### The Brave App

- Similar to hotlines, the app activates a call with a volunteer who will issue the callers "game plan" to EMS or an emergency contact if caller becomes unresponsive

15 potential lives saved [95% CI: 4, 26]

#### UnityPhilly - Philadelphia, USA

- Emergency response app to connect individuals who are experiencing an overdose to individuals trained and carrying naloxone.

33 potential Lives saved  
[95% CI: 9, 58]  
No deaths reported

#### Lifeguard App - British Columbia, Canada

- An alarm sounds 50 seconds after activation which must be shut off by the user, after 75 seconds of unresponsiveness EMS is dispatched

30 potential lives saved[95% CI: 8, 52]

#### Second Chance App

- Monitors the users vitals through inaudible sound waves
- An alarm that requests interaction is set off if abnormal or absent breathing is detected

No data available on the efficacy of the service in general use

#### iKeeper

- App sets a timer that triggers an emergency alarm which must be set off and if not emergency notifications are sent to Guardian Angels which will come to the users location and administer naloxone

No data available on the efficacy of the service

#### Digital Overdose Response Service (DORS) Alberta, Canada

- App sets a timer that triggers an emergency alarm which must be set off and if not emergency notifications are sent to Guardian Angels which will come to the users location and administer naloxone

8 potential lives saved  
[95% CI: 2, 14]

#### Better App

- App sets a timer that triggers an emergency alarm which must be set off and if not emergency notifications are sent to Guardian Angels which will come to the users location and administer naloxone

No emergency responses as of yet

#### Naxos Neighbors

- App sets a timer that triggers an emergency alarm which must be set off and if not emergency notifications are sent to Guardian Angels which will come to the users location and administer naloxone

No emergency responses as of yet
